# Supplementary material
Source: PubMed Central journal article supplement (PMC3923499)
Supplement: NIHMS315005-supplement-TableS2.pdf [file NIHMS315005-supplement-TableS2.pdf]

**Table S2.** Taxonomic information for the identical sequences (i.e., OTUs picked at 100% sequence similarity) shared between the Burmese python gut and its rat meal

| <b>Phylum</b>   | <b>Taxon</b>          | <b>No. of shared OTUs</b> | <b>% of shared OTUs</b> |
|-----------------|-----------------------|---------------------------|-------------------------|
| Firmicutes      | Lactobacillus         | 385                       | 52.2                    |
| Firmicutes      | Peptostreptococcaceae | 123                       | 16.7                    |
| Firmicutes      | Turicibacter          | 104                       | 14.1                    |
| Firmicutes      | Clostridium           | 56                        | 7.6                     |
| Firmicutes      | Enterococcus          | 10                        | 1.4                     |
| Bacteroidetes   | Bacteroides           | 5                         | 0.7                     |
| Firmicutes      | Clostridiales         | 5                         | 0.7                     |
| Firmicutes      | Streptococcus         | 4                         | 0.5                     |
| Firmicutes      | Ruminococcaceae       | 4                         | 0.5                     |
| Firmicutes      | Staphylococcus        | 3                         | 0.4                     |
| Proteobacteria  | Enterobacteriaceae    | 3                         | 0.4                     |
| Proteobacteria  | Enterobacter          | 3                         | 0.4                     |
| Firmicutes      | Lactobacillales       | 2                         | 0.3                     |
| Proteobacteria  | Pseudomonas           | 2                         | 0.3                     |
| Actinobacteria  | Actinobacteria        | 1                         | 0.1                     |
| Actinobacteria  | Corynebacterium       | 1                         | 0.1                     |
| Actinobacteria  | Propionibacterium     | 1                         | 0.1                     |
| Bacteroidetes   | Parabacteroides       | 1                         | 0.1                     |
| Bacteroidetes   | Alistipes             | 1                         | 0.1                     |
| Firmicutes      | Bacillales            | 1                         | 0.1                     |
| Firmicutes      | Jeotgalicoccus        | 1                         | 0.1                     |
| Firmicutes      | Aerococcus            | 1                         | 0.1                     |
| Firmicutes      | Granulicatella        | 1                         | 0.1                     |
| Firmicutes      | Enterococcaceae       | 1                         | 0.1                     |
| Firmicutes      | Lactococcus           | 1                         | 0.1                     |
| Firmicutes      | Clostridia            | 1                         | 0.1                     |
| Firmicutes      | Lachnospiraceae       | 1                         | 0.1                     |
| Firmicutes      | Anaerotruncus         | 1                         | 0.1                     |
| Firmicutes      | Erysipelotrichaceae   | 1                         | 0.1                     |
| Firmicutes      | Allobaculum           | 1                         | 0.1                     |
| Firmicutes      | Erysipelotrichaceae   | 1                         | 0.1                     |
| Proteobacteria  | Betaproteobacteria    | 1                         | 0.1                     |
| Proteobacteria  | Comamonas             | 1                         | 0.1                     |
| Proteobacteria  | Delftia               | 1                         | 0.1                     |
| Proteobacteria  | Proteus               | 1                         | 0.1                     |
| Proteobacteria  | Stenotrophomonas      | 1                         | 0.1                     |
| Verrucomicrobia | Akkermansia           | 1                         | 0.1                     |
| Firmicutes      |                       | 1                         | 0.1                     |
| Unknown         |                       | 4                         | 0.5                     |
| <b>Total:</b>   |                       | <b>737</b>                | <b>100</b>              |
